# Supplementary material for: Assessment of aggregative growth of MnZn ferrite nanoparticles
Source: Royal Society of Chemistry journal article supplement (doi:10.1039/c6nr06819g), 2016-01-01
Supplement: c6nr06819g1.pdf [file c6nr06819g1.pdf]

## Electronic Supplementary Information

### Assessment of Aggregative Growth of MnZn Ferrite Nanoparticles

Han-Wen Cheng<sup>a,b</sup>, Jing Li<sup>b</sup>, Season Wong<sup>‡</sup>, and Chuan-Jian Zhong<sup>b\*</sup>

<sup>a</sup> School of Chemical and Environmental Engineering, Shanghai Institute of Technology,  
Shanghai 201418, China

<sup>b</sup> Department of Chemistry, State University of New York at Binghamton, Binghamton,  
NY13902, USA

#### Additional Experimental Data:

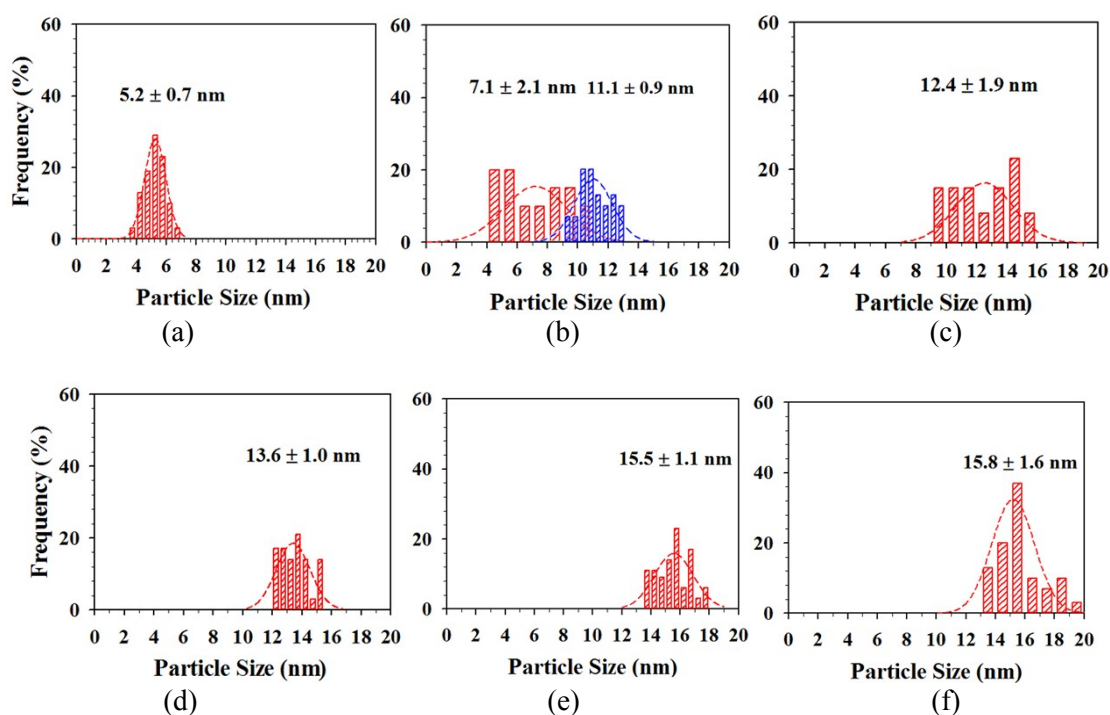

**Fig. S1.** Size distributions for MnZn ferrite nanoparticles synthesized at reflux temperature  $T = 280\text{ }^{\circ}\text{C}$  (TEM images in **Fig. 1**) reaction time  $t = 20$  (a,  $5.2 \pm 0.7\text{ nm}$ ), 30 (b,  $7.1 \pm 2.1\text{ nm}$ ;  $11.1 \pm 0.9\text{ nm}$ ), 40 (c,  $12.4 \pm 1.9\text{ nm}$ ), 50 (d,  $13.6 \pm 1.0\text{ nm}$ ), 60 (e,  $15.5 \pm 1.1\text{ nm}$ ) and 70 (f,  $15.8 \pm 1.6\text{ nm}$ ) mins, respectively.

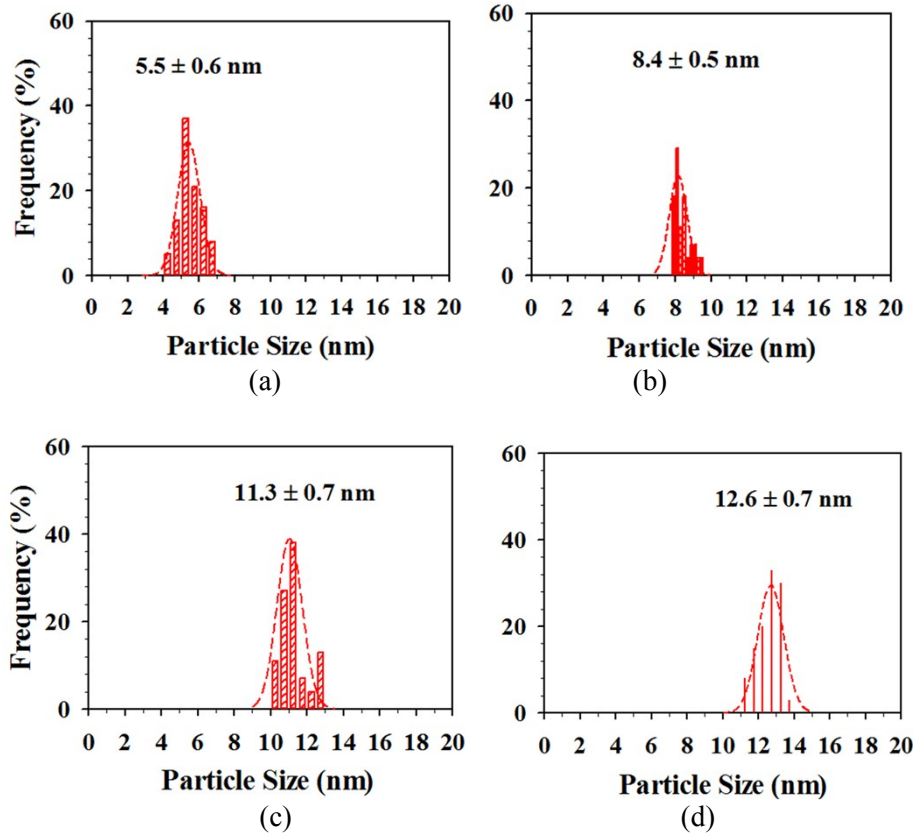

**Fig. S2.** Size distributions for MnZn ferrite nanoparticles synthesized at reflux temperature  $T = 270$  °C (TEM images in **Fig. 3**), reaction time  $t = 20$  (a,  $5.5 \pm 0.6$  nm), 40 (b,  $8.4 \pm 0.5$  nm), 60 (c,  $11.3 \pm 0.7$  nm) and 80 (d,  $12.6 \pm 0.7$  nm) mins, respectively.

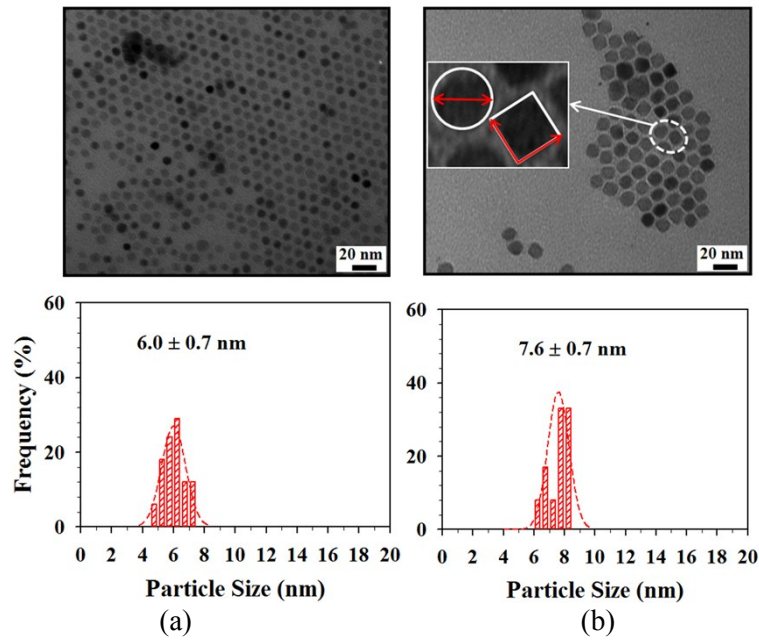

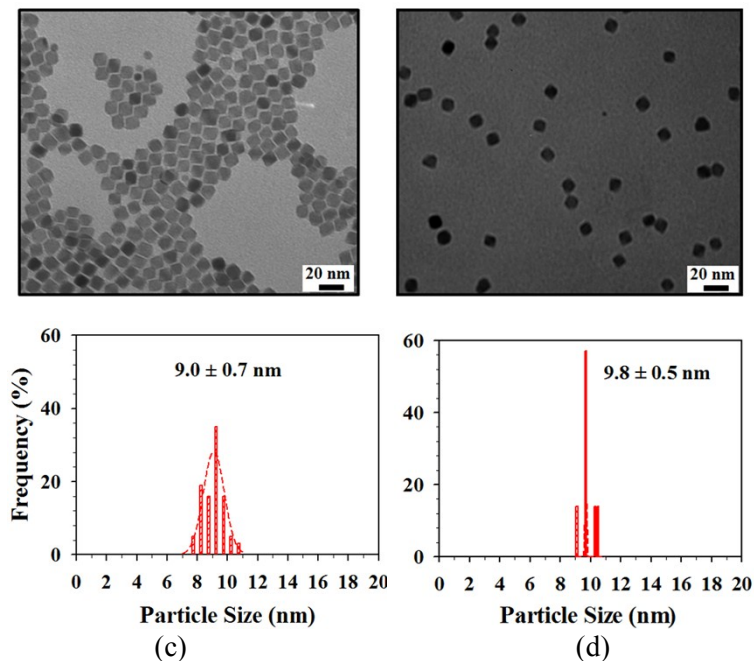

**Fig. S3.** TEM micrographs and size distributions for MnZn ferrite nanoparticles synthesized at reflux temperature  $T=270\text{ }^{\circ}\text{C}$ , reaction time  $t=20$  (a,  $6.0 \pm 0.7\text{ nm}$ ), 40 (b,  $7.6 \pm 0.7\text{ nm}$ ), 60 (c,  $9.0 \pm 0.7\text{ nm}$ ) and 80 (d,  $9.8 \pm 0.5\text{ nm}$ ) mins, respectively. As indicated in (b), the overall average size of the particles was determined by measuring the diameters for the spherical particles and the side lengths for the cubic nanoparticles.

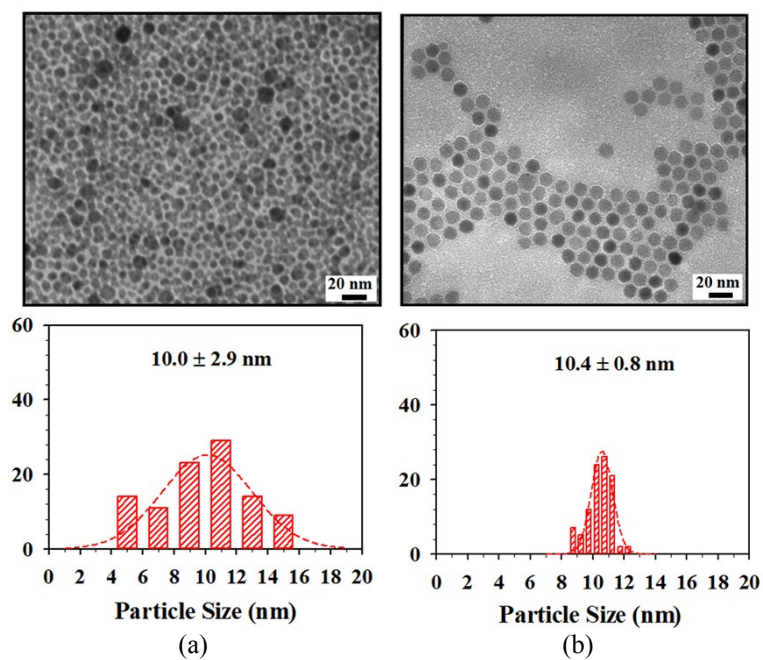

**Fig. S4.** TEM micrographs and size distributions for MnZn ferrite nanoparticles synthesized at reflux temperature  $T=250\text{ }^{\circ}\text{C}$ , reaction time  $t=80$  mins (a,  $10.0 \pm 2.9\text{ nm}$ ) and  $T=260\text{ }^{\circ}\text{C}$ ,  $t=80$  mins (b,  $10.4 \pm 0.8\text{ nm}$ ).

**Table S1.** Composition and morphology of selected samples of MnZn ferrite nanoparticles analyzed by DCP-AES.

| Temperature (°C) | Reaction time (min) | Composition                                                                                                    | Shape & size (nm)         |
|------------------|---------------------|----------------------------------------------------------------------------------------------------------------|---------------------------|
| 270              | 20                  | (Mn <sup>2+</sup> <sub>0.5</sub> Zn <sup>2+</sup> <sub>0.5</sub> )Fe <sup>3+</sup> <sub>2</sub> O <sub>4</sub> | Sphere (6.0 ± 0.7)        |
| 270              | 60                  | (Mn <sup>2+</sup> <sub>0.3</sub> Zn <sup>2+</sup> <sub>0.7</sub> )Fe <sup>3+</sup> <sub>2</sub> O <sub>4</sub> | Cube (9.0 ± 0.7)          |
| 240              | 60                  | (Mn <sup>2+</sup> <sub>0.3</sub> Zn <sup>2+</sup> <sub>0.7</sub> )Fe <sup>3+</sup> <sub>2</sub> O <sub>4</sub> | Cube (16.9 ± 1.8)         |
| 210              | 60                  | (Mn <sup>2+</sup> <sub>0.3</sub> Zn <sup>2+</sup> <sub>0.7</sub> )Fe <sup>3+</sup> <sub>2</sub> O <sub>4</sub> | Mostly sphere (9.9 ± 0.7) |

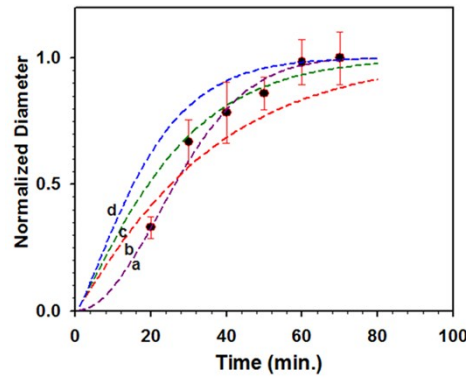

**Fig. S5.** A kinetic plot of the particle size for MnZn ferrite nanoparticles synthesized at reflux temperature  $T = 280$  °C (data extracted from Fig. 1), reaction time  $t = 20 \sim 70$  mins. Dashed lines: the theoretical fit based on Avrami model (eqn. (1)) yields (a)  $k = 0.001 \text{ s}^{-1}$  and  $n = 2$ , (b)  $k = 0.02 \text{ s}^{-1}$  and  $n = 1.1$ , (c)  $k = 0.02 \text{ s}^{-1}$  and  $n = 1.2$ , (d)  $k = 0.02 \text{ s}^{-1}$  and  $n = 1.3$ .

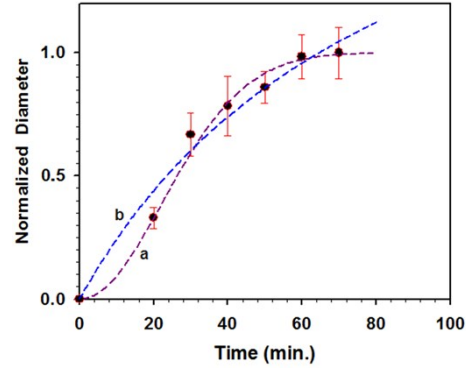

**Fig. S6.** A kinetic plot of the particle size for MnZn ferrite nanoparticles synthesized at reflux temperature  $T = 280$  °C (data extracted from Fig. 1), reaction time  $t = 20 \sim 70$  mins. Red dashed line (a): the theoretical fit based on Avrami model (eqn. (1)), yielding (a)  $k = 0.001 \text{ s}^{-1}$  and  $n = 2$ . The experimental data are clearly

not fitted well by the “1+1” oriented attachment model [ref S1]:  $D = \frac{D_0(\sqrt[3]{2} \times k_1 \times t + 1)}{k_1 \times t + 1}$ , where  $D_0$  and  $D$

are the average size of primary particles and the average particle size at time  $t$ , respectively.  $k_1$  is the rate constants for the model. Note that a general equation,  $y = (1+a'x)/(b'+c'x)$ , was used as simplified equation of the above equation in fitting the experimental data. In this case, the best fitting as shown by the blue

dashed curve (b) ( $a' = 1.86 \times 10^6$ ,  $b' = 6.8 \times 10^7$  and  $c' = 8.0 \times 10^5$ ), which is apparently rather poor in comparison with the experimental data and Avrami model fitting (a).

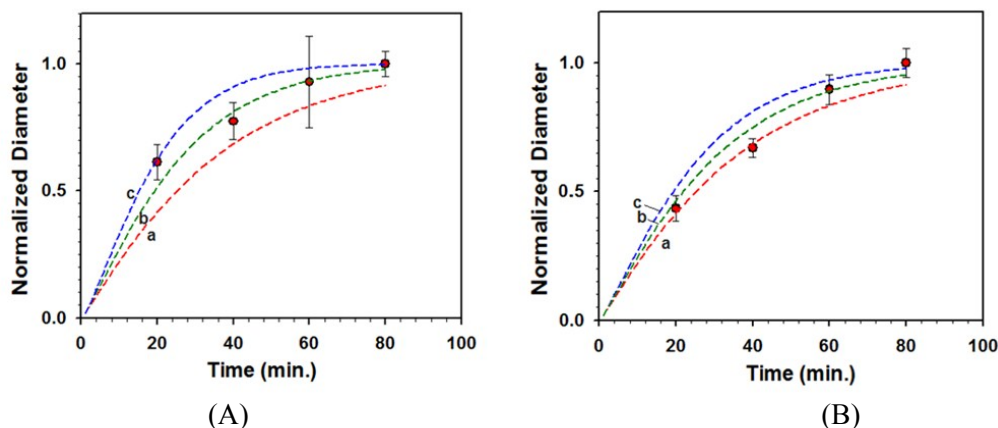

**Fig. S7.** Kinetic plots of the particle size for MnZn ferrite nanoparticles synthesized at reflux temperature  $T = 270\text{ }^{\circ}\text{C}$ , reaction time  $t = 20 \sim 70$  mins, (A) data extracted from Fig. S3, (B) data extracted from Fig. 3. Dashed lines: the theoretical fit based on Avrami model (eqn. (1)) yields (A): (a)  $k = 0.02\text{ s}^{-1}$  and  $n = 1.1$ , (b)  $k = 0.02\text{ s}^{-1}$  and  $n = 1.2$ , (c)  $k = 0.02\text{ s}^{-1}$  and  $n = 1.3$ , (B): (a)  $k = 0.02\text{ s}^{-1}$  and  $n = 1.1$ , (b)  $k = 0.02\text{ s}^{-1}$  and  $n = 1.15$ , (c)  $k = 0.02\text{ s}^{-1}$  and  $n = 1.2$ .

**Table S2.** Summary kinetics analysis results:

| Temperature ( $^{\circ}\text{C}$ ) | Reaction time (min) | $k\text{ (s}^{-1}\text{)}$ | $n$         | Mean shape&size                             | Fig #        |
|------------------------------------|---------------------|----------------------------|-------------|---------------------------------------------|--------------|
| 280 $^{\circ}\text{C}$             | 80                  | 0.001                      | 2           | Cube ( $\sim 15.9\text{ nm}$ ) <sup>a</sup> | Fig. 1 (f)   |
| 270 $^{\circ}\text{C}$             | 80                  | 0.02                       | 1.2 or 1.15 | Cube ( $12.6 \pm 0.7$ )                     | Fig. 3 (d)   |
| 260 $^{\circ}\text{C}$             | 80                  | 0.02                       | 1.4         | Hexa ( $10.4 \pm 0.8$ )                     | Fig. S4B     |
| 250 $^{\circ}\text{C}$             | 80                  |                            |             | Sphere ( $10.0 \pm 2.9$ )                   | Fig. S4A (b) |

<sup>a</sup> For a direct comparison of the size data, the 80-min particle size data were extracted from the curve fitting.

## Reference:

[S1] X. G. Xue, R. L. Penn, E. R. Leite, F. Huang and Z. Lin, *CrystEngComm*, 2014, **16**, 1419-1429.
